# Supplementary material
Source: PubMed Central journal article supplement (PMC5083105)
Supplement: 10.1074_M115.057240_mcp.M115.057240-1.pdf [file 10.1074_M115.057240_mcp.M115.057240-1.pdf]

## **Supplemental Figure Legends**

Supplemental Figure S1. Distribution of ppm mass accuracy for all identified spectra.

Supplemental Figure S2. Reverse volcano plot of all quantified protein identifications comparing PM and TM results. Shown in a red dotted line is the  $>0.05$  pvalue cutoff, resulting in the 635 proteins deemed differentially abundant between PM and TM preparations.
