# Supplementary material
Source: PubMed Central journal article supplement (PMC5083105)

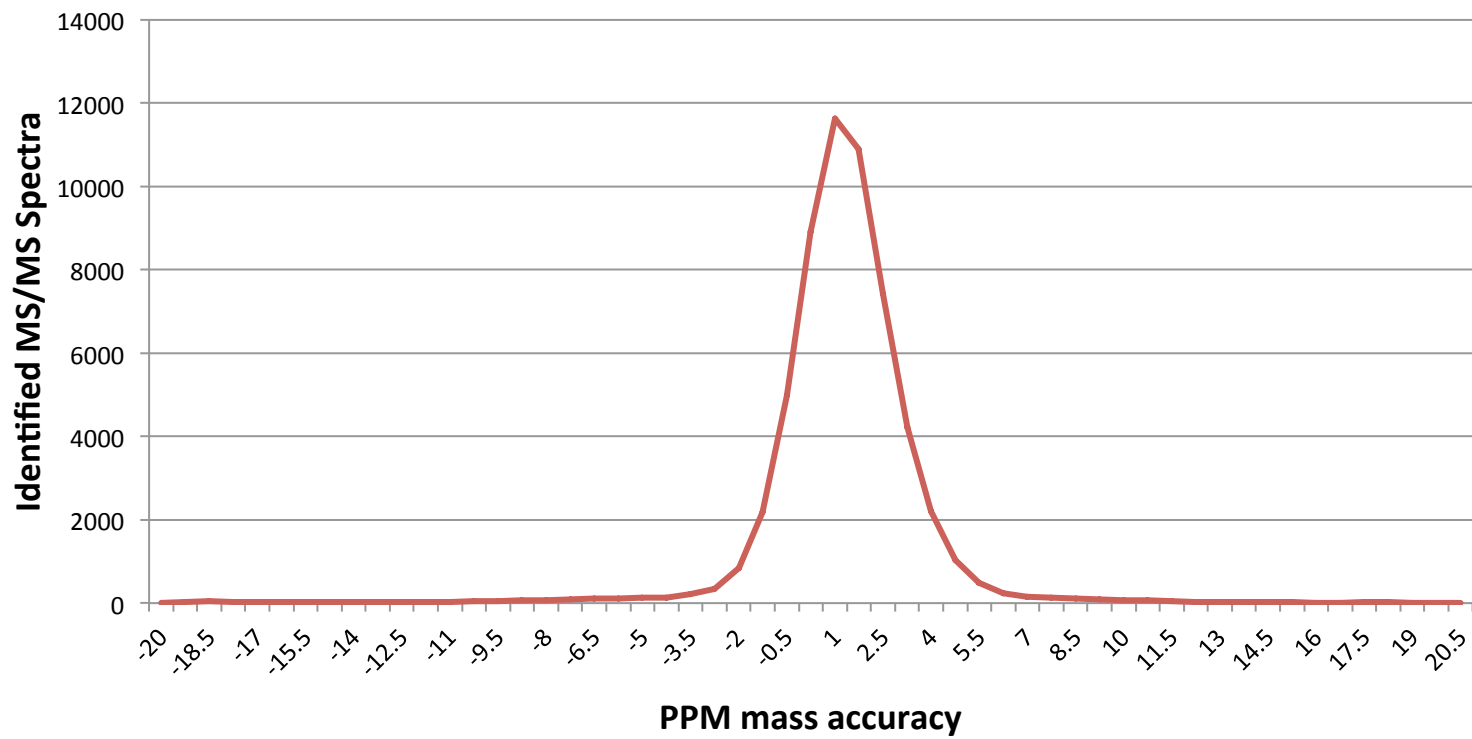

Supplement: 10.1074_M115.057240_mcp.M115.057240-5.pdf [file 10.1074_M115.057240_mcp.M115.057240-5.pdf]

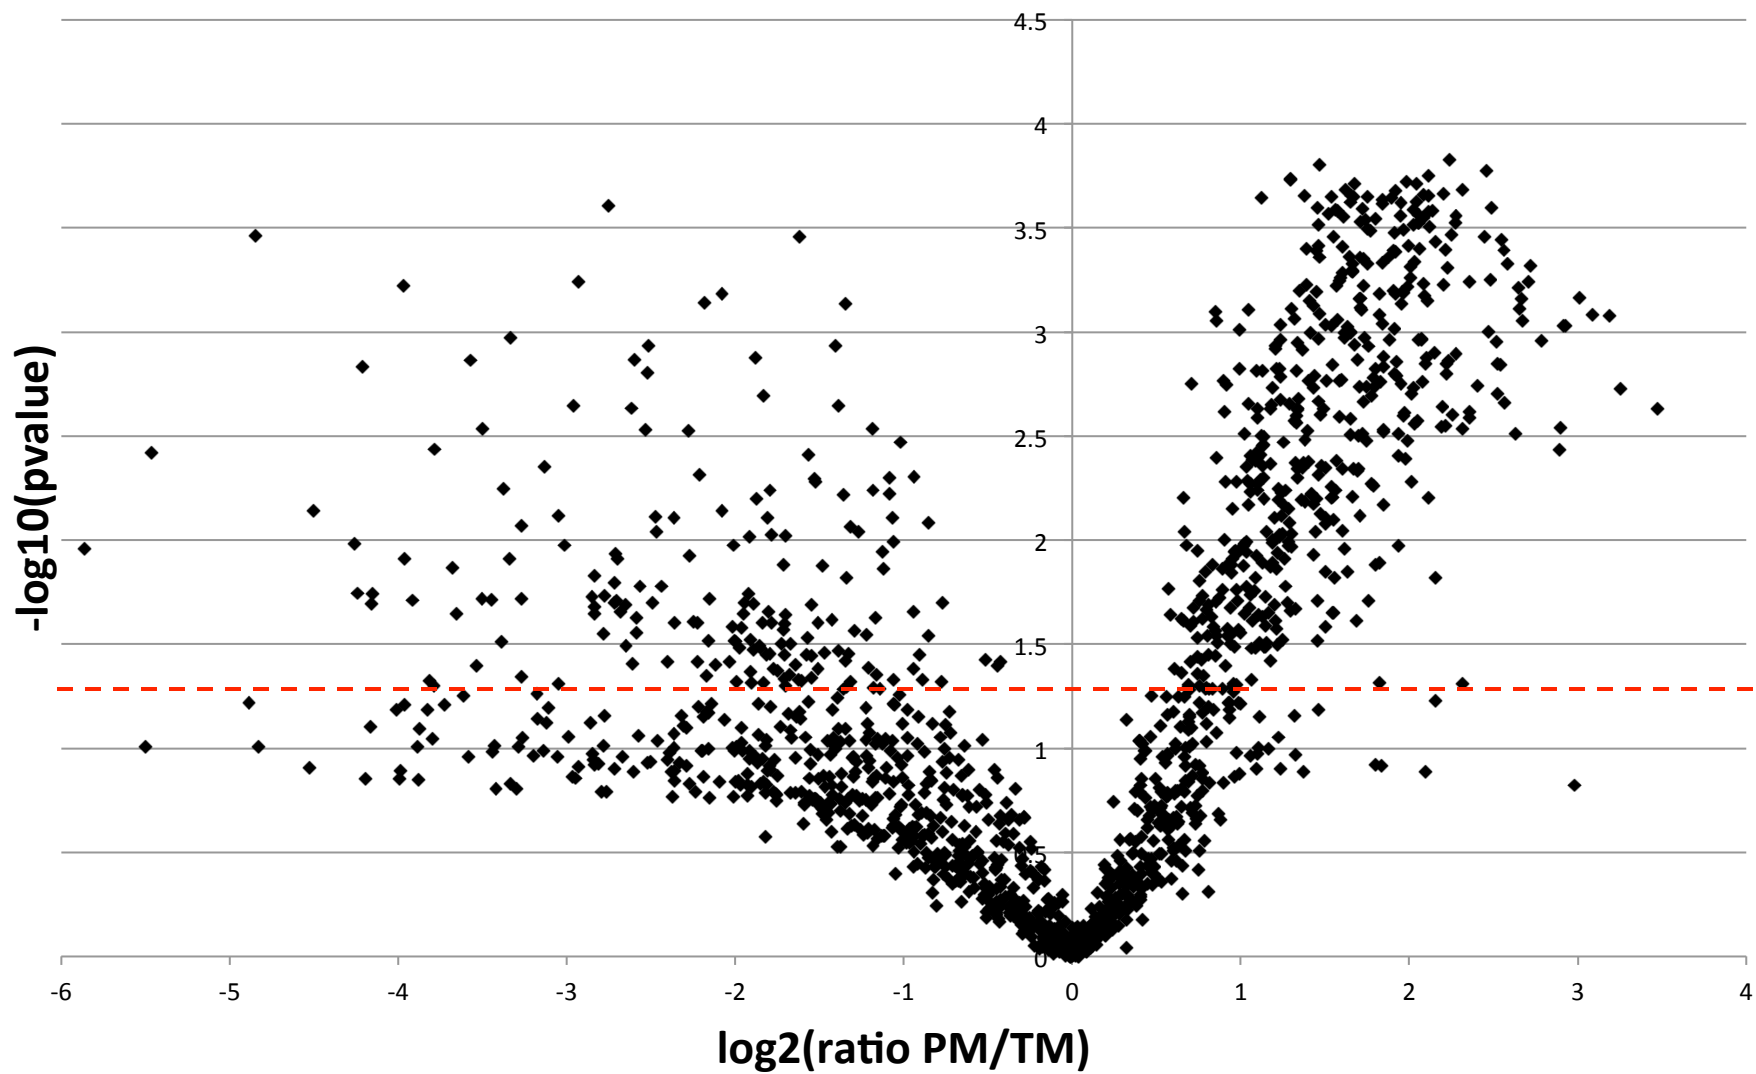

Supplement: 10.1074_M115.057240_mcp.M115.057240-6.pdf [file 10.1074_M115.057240_mcp.M115.057240-6.pdf]
